# Supplementary material for: Wafer-scale freestanding vanadium dioxide film
Source: PubMed Central journal article supplement — Sci Adv. 2021 Dec 8;7(50):eabk3438. doi: 10.1126/sciadv.abk3438 (PMC8654297; doi:10.1126/sciadv.abk3438), 2021-12-08
Supplement: sciadv.abk3438_sm.pdf [file sciadv.abk3438_sm.pdf]

Supplementary Materials for  
**Wafer-scale freestanding vanadium dioxide film**

He Ma, Xiao Xiao, Yu Wang, Yufei Sun, Bolun Wang, Xinyu Gao, Enze Wang, Kaili Jiang,  
Kai Liu\*, Xinping Zhang\*

\*Corresponding author. Email: liuk@tsinghua.edu.cn (K.L.); zhangxinping@bjut.edu.cn (X.Z.)

Published 8 December 2021, *Sci. Adv.* 7, eabk3438 (2021)  
DOI: 10.1126/sciadv.abk3438

**This PDF file includes:**

Figs. S1 to S21  
Tables S1 to S3  
References

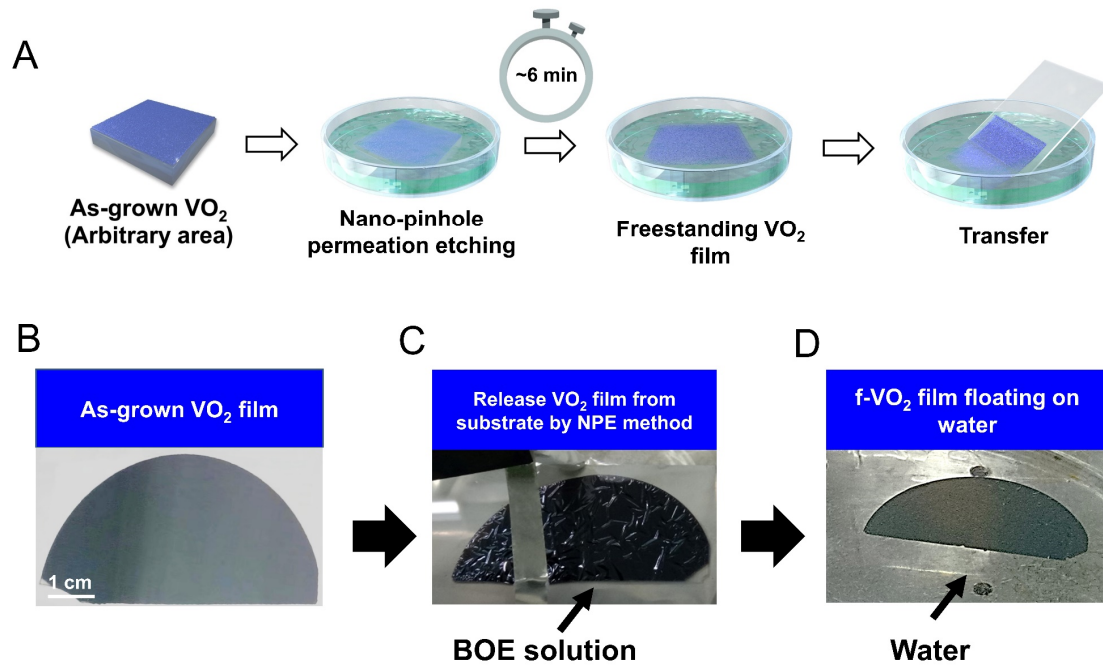

**Fig. S1 Wafer-scale f-VO<sub>2</sub> film prepared by the nano-pinhole permeation-etching method.** (A) Schematic diagram for preparing freestanding VO<sub>2</sub> (f-VO<sub>2</sub>) films. (B) Optical image of as-grown VO<sub>2</sub> film on the quartz substrate. (C) Detachment of the VO<sub>2</sub> film by NPE method. (D) f-VO<sub>2</sub> film floating on water. Photo credit: He Ma, Beijing University of Technology.

Fig. S1A shows the schematic diagram for preparing the freestanding VO<sub>2</sub> (f-VO<sub>2</sub>) film. The VO<sub>2</sub> film with nano-pinholes (Fig. S1B) was immersed into the BOE solution in a stainless-steel container. By removing the VO<sub>2</sub>/SiO<sub>2</sub> interface layer, the VO<sub>2</sub> layer gradually separated from the SiO<sub>2</sub> substrate (Fig. S1C). After removing the interface layer, the container was slowly lifted from the BOE solution and gently immersed in clean water. The surface tension of the water caused the f-VO<sub>2</sub> film to float on the surface (Fig. S1D). We then transferred the floating f-VO<sub>2</sub> film to another dish with clean water to remove the residual BOE solution. Finally, we transferred the f-VO<sub>2</sub> film to the desired target substrate.

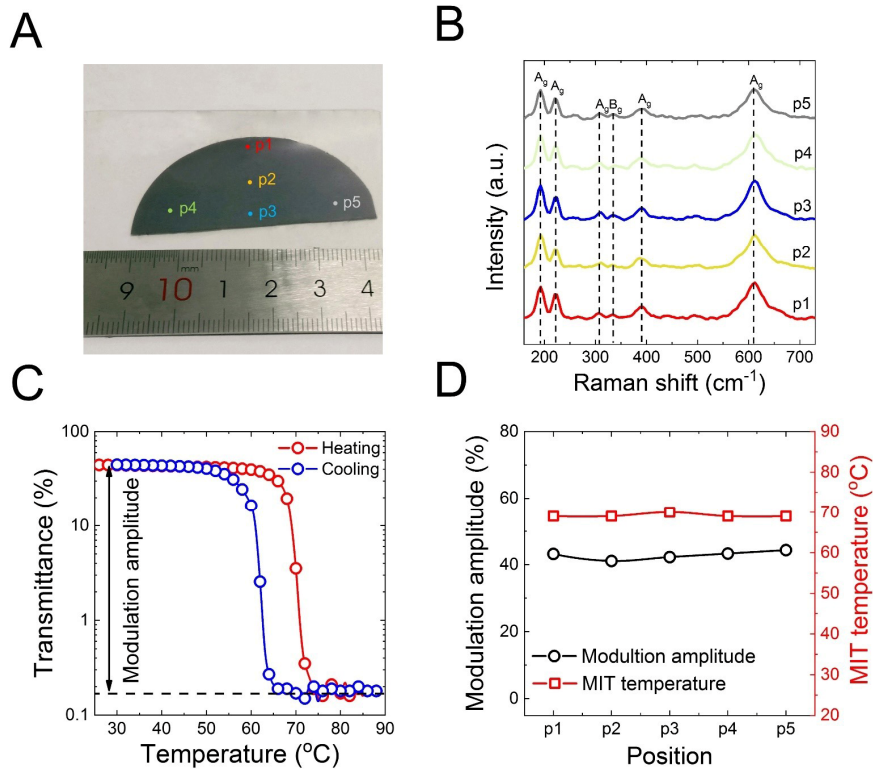

**Fig. S2 Homogeneity of wafer-scale f-VO<sub>2</sub> film in its phase-transition and structural properties.** (A) Optical image of the wafer-scale f-VO<sub>2</sub> film transferred to a polyethylene terephthalate (PET) substrate. Photo credit: He Ma, Beijing University of Technology. (B) Raman spectra of the f-VO<sub>2</sub>/PET film at 5 positions (p1-p5, as labeled in S2A). (C) Temperature-dependent transmittance of the f-VO<sub>2</sub>/PET film at the wavelength of 1600 nm. (D) Modulation amplitude and MIT temperature (extracted from the heating curves) of the f-VO<sub>2</sub>/PET film at p1-p5.

We transferred a wafer-scale f-VO<sub>2</sub> film to a polyethylene terephthalate (PET) substrate to facilitate the characterization. Subsequently, the structural and the phase-transition homogeneity of the f-VO<sub>2</sub>/PET film were evaluated by optical approaches. As shown in Figs. S2A and S2B, Raman spectra collected from 5 different positions (labeled as p1-p5 in Fig. S2A) in the f-VO<sub>2</sub>/PET film identically reveal the VO<sub>2</sub> lattice vibration modes, demonstrating a good structural homogeneity of the wafer-scale f-VO<sub>2</sub> film. Moreover, the optical transmittance-temperature curves around the same 5 positions were also measured at the wavelength of 1600 nm, as shown in Figs. S2C and S2D. Due to the metal-insulator phase transition (MIT) of VO<sub>2</sub>, the transmittance of the f-VO<sub>2</sub>/PET film is modulated from 45% to 0.18% when the temperature is increased from 25 to 90 °C (Fig. S2C). The f-VO<sub>2</sub>/PET film has almost identical MIT temperature and the modulation amplitude of the transmittance at the 5 different positions distributed in the entire film (Fig. S2D), indicating the excellent phase-transition homogeneity of the wafer-scale f-VO<sub>2</sub> film.

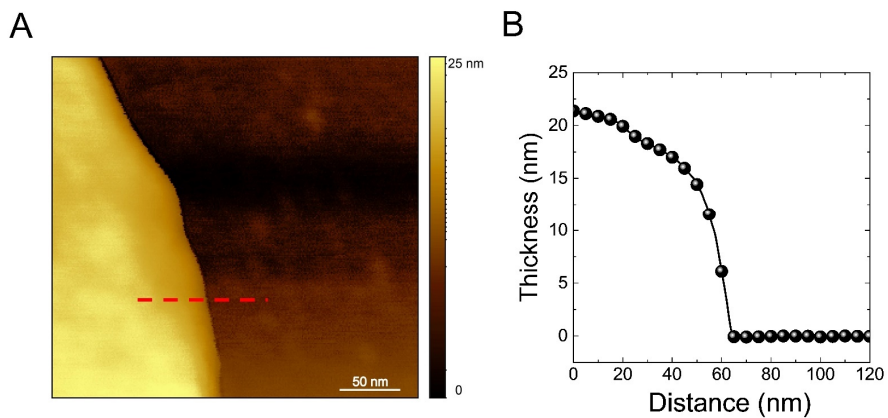

**Fig. S3 Atomic force microscopy characterization of 20-nm-thick f-VO<sub>2</sub> film.** (A) Atomic force microscopy (AFM) image of the f-VO<sub>2</sub> film. (B) Height profile of the along the dashed line in Fig. S3A, indicating the thickness of the f-VO<sub>2</sub> film was 20 nm.

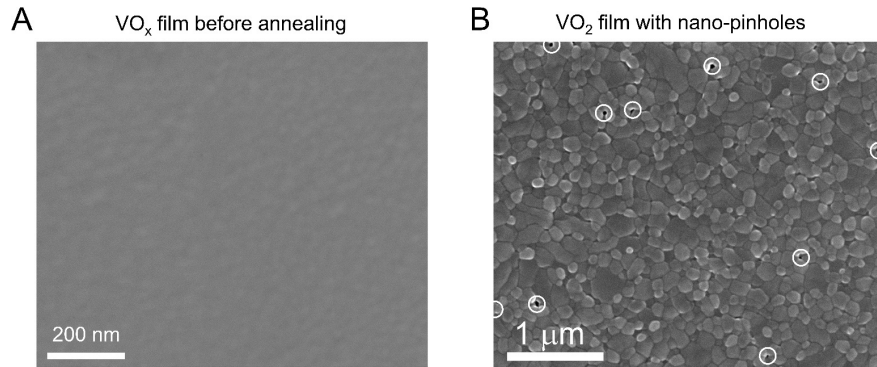

**Fig. S4 Scanning electron microscopy characterizations of VO<sub>2</sub> film. (A) before annealing and (B) after annealing.**

The VO<sub>2</sub> film used in this work was deposited on the SiO<sub>2</sub> substrate *via* reactive magnetic sputtering and a post-annealing process. The thickness of the VO<sub>2</sub> film was controlled *via* the sputtering time. We compared the surface morphology of the VO<sub>2</sub> film before and after the post-annealing process under a low-pressure oxygen atmosphere. The VO<sub>x</sub> film was smooth and dense (Fig. S4A), which transformed to form a granulated VO<sub>2</sub> film because of crystallization of the VO<sub>x</sub> film after annealing. From the scanning electron microscopy (SEM) images (Fig. S4B), numerous nano-pinholes are observed on the VO<sub>2</sub> film.

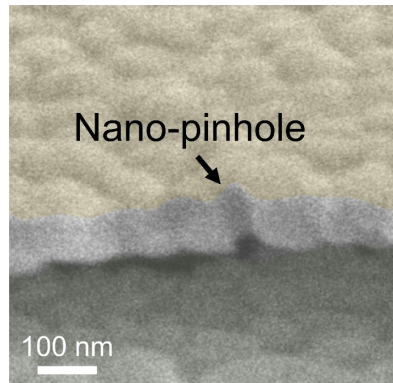

**Fig. S5 SEM characterization of the cross-section of the f-VO<sub>2</sub> film.** The nano-pinhole is indicated by the black arrow.

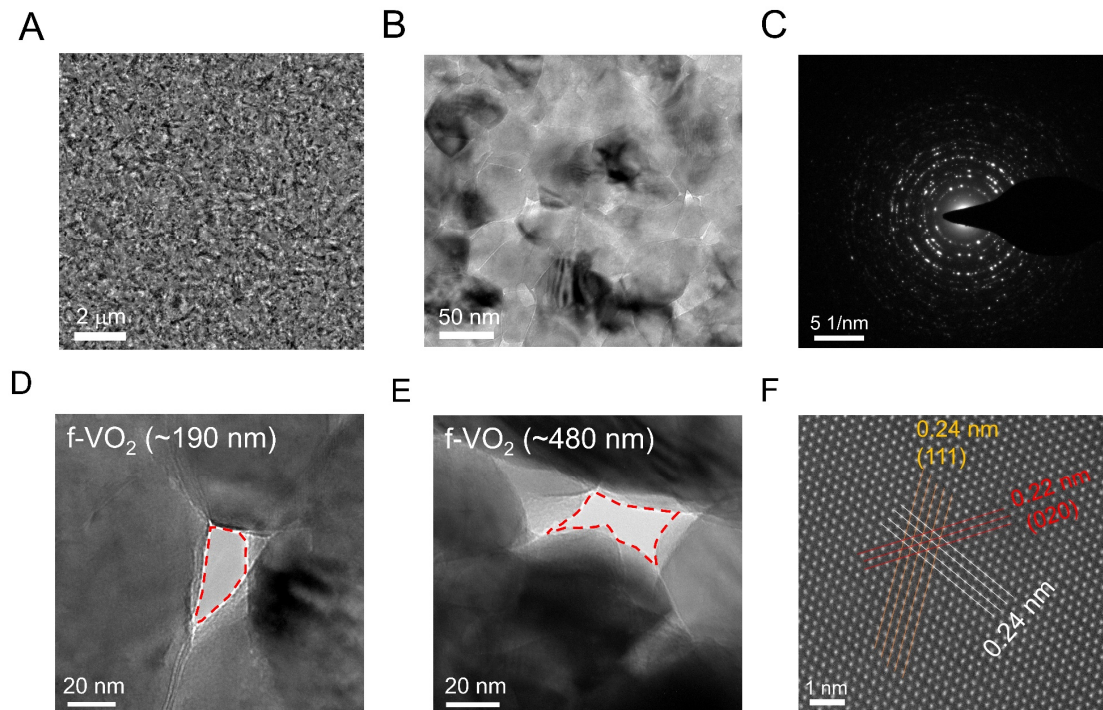

**Fig. S6. Transmission electron microscopy characterization of the f-VO<sub>2</sub> film.** (A) Transmission electron microscopy (TEM) image of the f-VO<sub>2</sub> film. (B) Enlarged TEM image of the f-VO<sub>2</sub> film. (C) Typical electron diffraction pattern of the f-VO<sub>2</sub> film. (D) Enlarged TEM image of a nano-pinhole in the 190-nm-thick f-VO<sub>2</sub> film. (E) Enlarged TEM image of a nano-pinhole in the 480-nm-thick f-VO<sub>2</sub> film. (F) Atomic high-angle annular dark-field scanning TEM image of a crystalline grain in f-VO<sub>2</sub> film.

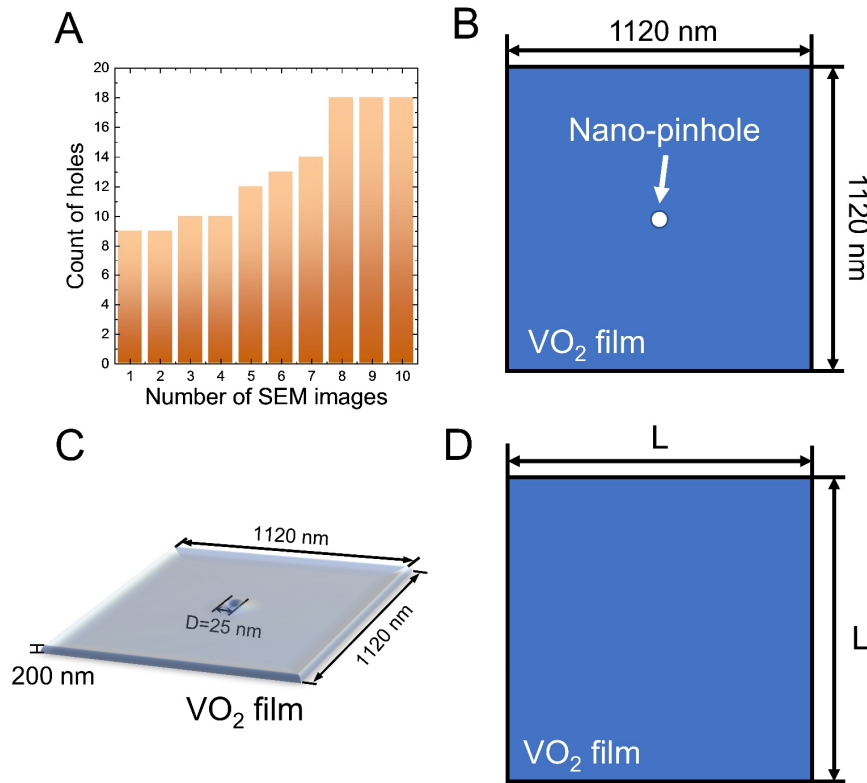

**Fig. S7. Histogram of nano-pinholes in the VO<sub>2</sub> film and geometrical models.** (A) Histogram of the number of nano-pinholes in the VO<sub>2</sub> film. (B) Geometrical model for releasing VO<sub>2</sub> film *via* NPE method. (C) Three-dimensional geometrical model of 200-nm-thick f-VO<sub>2</sub> film. (D) Geometrical model for the release of the dense VO<sub>2</sub> film *via* normal side etching.

The release time for the dense VO<sub>2</sub> film *via* normal side etching in Fig. 1F was calculated according to the geometrical model in Fig. S7D. The shape of the VO<sub>2</sub> film was simplified to a square. The etching rate of the BOE solution was 100 nm/min, and the release time was calculated by  $L/2/100$ .



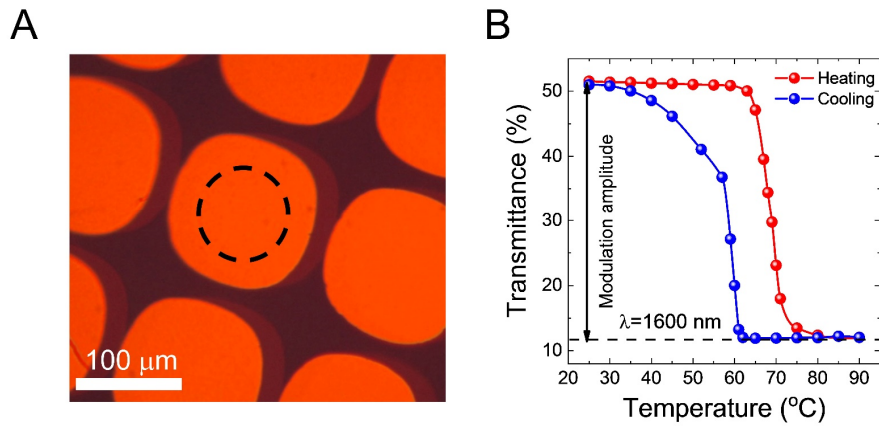

**Fig. S8. Temperature-dependent transmittance of the f-VO<sub>2</sub> film suspended on a copper grid.** (A) Optical microscopy image of the f-VO<sub>2</sub> film suspended on the copper grid. (B) Temperature-dependent transmittance of the f-VO<sub>2</sub> film marked by the cycle.

We measured the temperature-dependent transmittance ( $I$ ) of a 90-nm-thick f-VO<sub>2</sub> film suspended on a copper grid (Fig. S8A) at the wavelength 1600 nm. The modulation amplitude is defined as  $I_{(25\text{ }^{\circ}\text{C})} - I_{(90\text{ }^{\circ}\text{C})}$ . Therefore, the modulation amplitude of the f-VO<sub>2</sub> film reaches  $\sim 39\%$  (Fig. S8B).

**Table S1 Comparison of the modulation amplitude at the wavelength of 1600 nm of VO<sub>2</sub> films prepared by various methods.**

| Sample                                                      | Thickness of VO <sub>2</sub> layer (nm) | Preparation method        | Modulation amplitude at 1600 nm | References       |
|-------------------------------------------------------------|-----------------------------------------|---------------------------|---------------------------------|------------------|
| VO <sub>2</sub> /graphene/PET                               | 40                                      | Sputtering                | 33%                             | (52)             |
| VO <sub>2</sub> /glass                                      | 130                                     | Physical vapor deposition | 35%                             | (53)             |
| VO <sub>2</sub> /muscovite                                  | 50                                      | Pulsed laser deposition   | 32%                             | (54)             |
| VO <sub>2</sub> /mica                                       | 40                                      | Molecular beam epitaxy    | 28%                             | (55)             |
| PI/Cr <sub>2</sub> O <sub>3</sub> /VO <sub>2</sub>          | 80                                      | Sputtering                | 33%                             | (56)             |
| VO <sub>2</sub> /SnO <sub>2</sub> /glass                    | 60                                      | Pulsed laser deposition   | 35%                             | (57)             |
| VO <sub>2</sub> /Al <sub>2</sub> O <sub>3</sub>             | 50                                      | Pulsed laser deposition   | 33%                             | (58)             |
| VO <sub>2</sub> /quartz                                     | 90                                      | Pulsed laser deposition   | 36%                             | (59)             |
| Epitaxial VO <sub>2</sub> on Al <sub>2</sub> O <sub>3</sub> | 40                                      | Sputtering                | 25%                             | (60)             |
| Epitaxial VO <sub>2</sub> on c-plane sapphire               | 100                                     | Pulsed laser deposition   | 20%                             | (10)             |
| <b>f-VO<sub>2</sub> film</b>                                | <b>90</b>                               | <b>Sputtering</b>         | <b>39%</b>                      | <b>This work</b> |
| <b>f-VO<sub>2</sub> film</b>                                | <b>190</b>                              | <b>Sputtering</b>         | <b>49%</b>                      | <b>This work</b> |
| <b>f-VO<sub>2</sub>/mica film</b>                           | <b>190</b>                              | <b>Sputtering</b>         | <b>50%</b>                      | <b>This work</b> |

**Table S2 Comparison of the electrical property of the f-VO<sub>2</sub> film with other free-standing VO<sub>2</sub> films**

| Samples                                                 | Resistance change ratio across MIT<br>( $R_{30\text{ }^{\circ}\text{C}}/R_{90\text{ }^{\circ}\text{C}}$ ) | References       |
|---------------------------------------------------------|-----------------------------------------------------------------------------------------------------------|------------------|
| Epitaxial VO <sub>2</sub> membrane transferred onto PET | ~ 2200                                                                                                    | (17)             |
| Small-scale freestanding VO <sub>2</sub> membrane       | ~ 300                                                                                                     | (61)             |
| Small-scale freestanding VO <sub>2</sub> membrane       | ~ 500                                                                                                     | (62)             |
| VO <sub>2</sub> membrane transferred onto glass         | ~ 600                                                                                                     | (18)             |
| <b>Large-scale f-VO<sub>2</sub> films</b>               | <b>~ 2400</b>                                                                                             | <b>This work</b> |

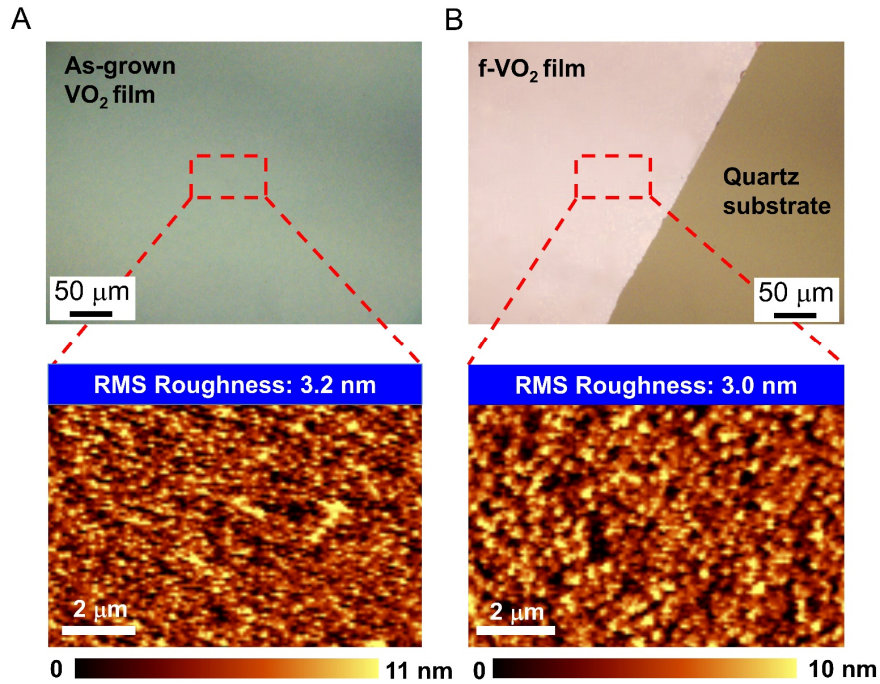

**Fig. S9 Comparison of surface morphologies of as-grown VO<sub>2</sub> film and f-VO<sub>2</sub> film.** (A) Optical microscopy image and AFM image of the as-grown VO<sub>2</sub> film . (B) Optical microscopy image and AFM image of the f-VO<sub>2</sub> film transferred to the quartz substrate.

The root-mean-square (RMS) roughness of our VO<sub>2</sub> films is calculated according to the equation  $\sqrt{\frac{1}{M \times N} \sum_{j=1}^N \sum_{i=1}^M [z(x_i, y_j) - \bar{z}]^2}$  by the ‘WITec Project’ software, where M presents the number of pixels in a row, N presents the number of pixels in a column,  $x_i$ ,  $y_j$ , and  $z$  present the coordinates in x axis, y axis, and the height, and  $\bar{z}$  presents the mean height. The RMS roughnesses of the as-grown VO<sub>2</sub> film (thickness ~80 nm) and the f-VO<sub>2</sub> film (thickness ~80 nm) transferred to the quartz substrate are 3.2 and 3.0 nm, respectively. These values are comparable with the RMS roughness of the epitaxial VO<sub>2</sub> crystal film on sapphire, as reported in the literature (J. Appl. Phys., 2013, 113, 043707, Phys. Rev. Mater, 2018, 2, 034605).

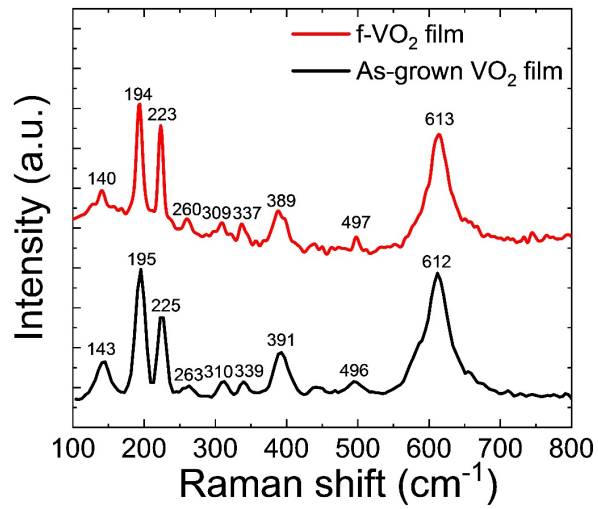

**Fig. S10 Raman spectra of VO<sub>2</sub> films.** The black line: as-grown VO<sub>2</sub> film. The red line: f-VO<sub>2</sub> film transferred to the quartz substrate.

Because of the small thermal capacity of the f-VO<sub>2</sub> film, the f-VO<sub>2</sub> film was easily heated by the laser. To decrease the thermal effect of laser in the Raman measurement, particularly in the temperature-dependent Raman measurement, we measured the Raman spectrum of the f-VO<sub>2</sub> film transferred to the quartz substrate and compared it with that of as-grown VO<sub>2</sub> film (Fig. S10).

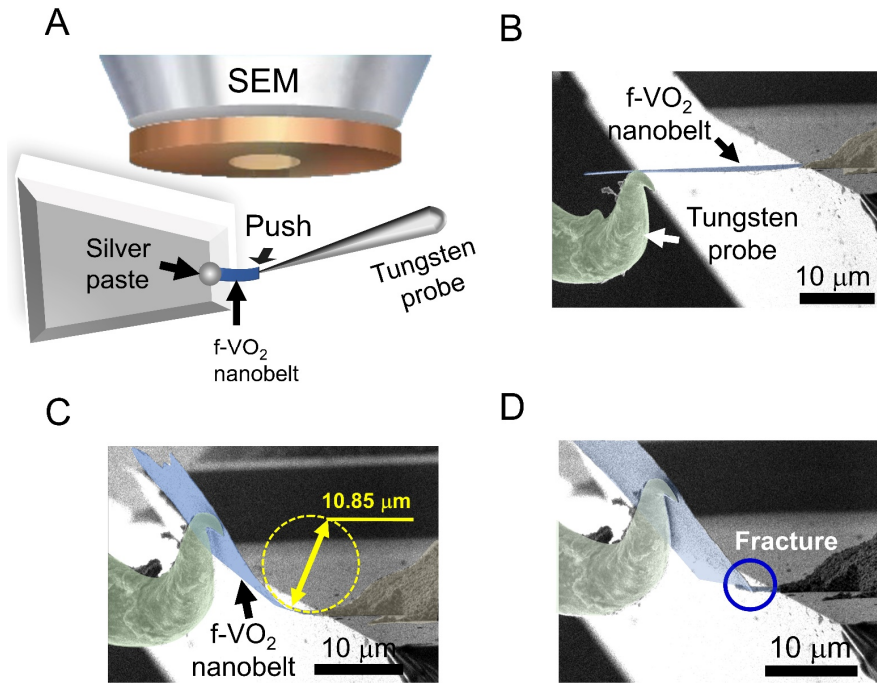

**Fig. S11 Measurement of the mechanical property of the f-VO<sub>2</sub> film.** (A) Schematic diagram for *in-situ* bending of the f-VO<sub>2</sub> film in the SEM using the tungsten probe. (B) SEM image showing the tungsten probe touch the f-VO<sub>2</sub> nanobelt. (C) Bending the f-VO<sub>2</sub> nanobelt to curvature of  $0.184 \mu\text{m}^{-1}$ . (D) SEM image for the fracture of the f-VO<sub>2</sub> nanobelt.

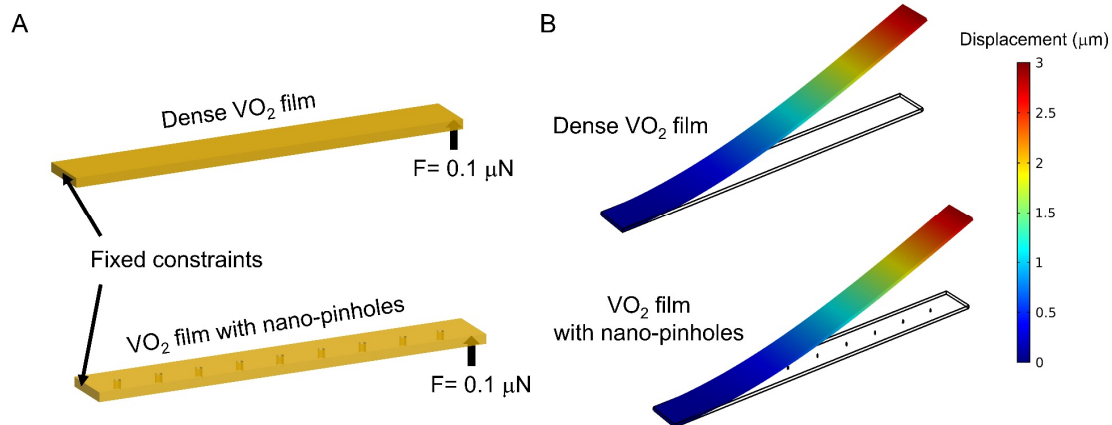

**Fig. S12 Simulation of mechanical deformations of VO<sub>2</sub> films.** (A) Geometrical models of the dense VO<sub>2</sub> film and the VO<sub>2</sub> film with nano-pinholes. (B) Deformations of the dense VO<sub>2</sub> film and the VO<sub>2</sub> film with nano-pinholes pushed by force.

Deformations of the dense VO<sub>2</sub> film and the VO<sub>2</sub> film with nano-pinholes pushed by force were simulated by the solid mechanics model in COMSOL Multiphysics software. For the solid mechanics model, the equation  $\nabla \cdot \mathbf{S} + \mathbf{F}_v = 0$  was solved, where  $\mathbf{S}$  was the stress tensor and  $\mathbf{F}_v$  was the deformation gradient. In our simulation, the length, width, and thickness of the VO<sub>2</sub> film were 10, 1, and 0.1 μm, respectively. For the VO<sub>2</sub> film with nano-pinholes, the diameter of a nano-pinhole and the interval space between nano-pinholes were 20 nm and 1 μm, respectively. The Young's modulus of the VO<sub>2</sub> film was set to be 140 Gpa.

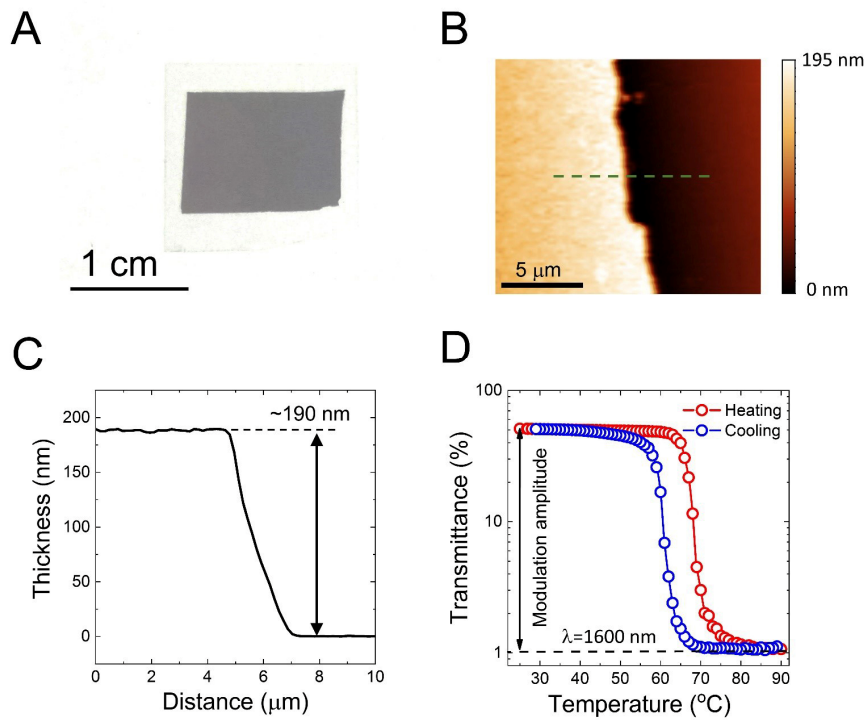

**Fig. S13 Optical property of the f-VO<sub>2</sub>/mica film.** (A) Optical image of the f-VO<sub>2</sub>/mica film. Photo credit: He Ma, Beijing University of Technology. (B) AFM image at the edge of the VO<sub>2</sub> film. (C) Height profile along the dashed line in Fig. S13B, indicating the thickness of the VO<sub>2</sub> film is ~190 nm. (D) Temperature-dependent transmittance of the f-VO<sub>2</sub>/mica film at the wavelength of 1600 nm.

The transmittance of the f-VO<sub>2</sub>/mica film is 51.08% at room temperature and decreases to 1.07% at 90 °C. the modulation amplitude of the f-VO<sub>2</sub>/mica film attains 50.1% at the wavelength of 1600 nm.



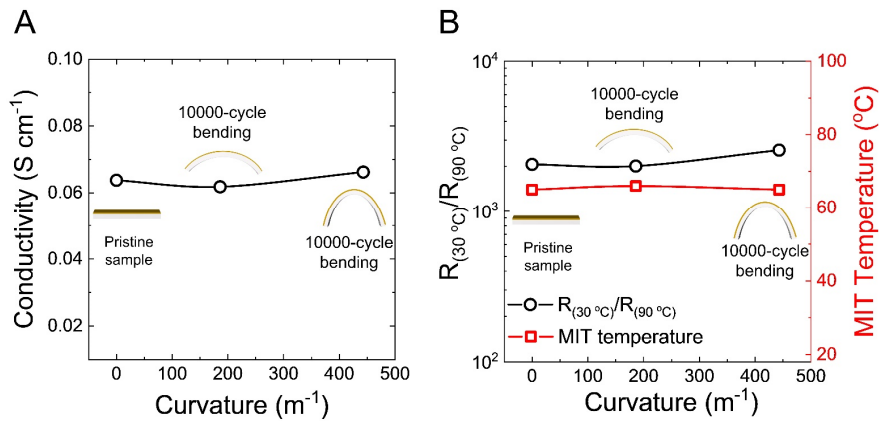

**Fig. S14 Dependence of electrical properties of f-VO<sub>2</sub>/mica films on the curvature and the bending cycles.** (A) Electrical conductivity of f-VO<sub>2</sub>/mica films as a function of curvature. (B) Resistance change ratio from 30 to 90 °C and MIT temperature (extracted from the heating curves) of the f-VO<sub>2</sub>/mica films as a function of curvature.

We transferred an f-VO<sub>2</sub> film to a thin mica film and subsequently cut the VO<sub>2</sub>/mica film into three pieces. The R-T relationship of sample #1 was measured directly, while those of samples #2 and #3 were measured after the samples were bent to the curvature of 186 and 443 m<sup>-1</sup>, respectively, by 10,000 cycles. As shown in Fig. S14, the electrical conductivity, the resistance change ratio from 30 to 90 °C, and the MIT temperature of the VO<sub>2</sub>/mica film are not altered with the curvature and bending cycles, demonstrating the excellent mechanical stability of the f-VO<sub>2</sub> film.

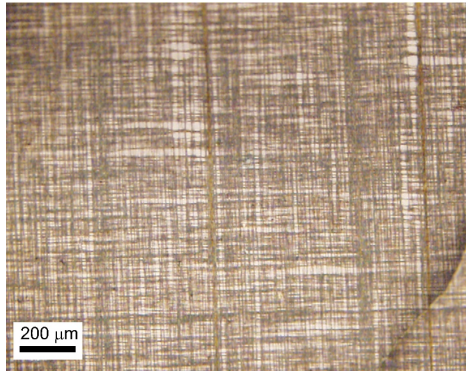

**Fig. S15 Optical microscopy image of the f-VO<sub>2</sub>/CNT film.**

**Table S3 Comparison of the THz modulation depth of different VO<sub>2</sub> films.**

| Sample                                             | Thickness of VO <sub>2</sub> layer (nm) | Preparation method      | Modulation depth | References       |
|----------------------------------------------------|-----------------------------------------|-------------------------|------------------|------------------|
| VO <sub>2</sub> /Si                                | 220                                     | Sol-Gel                 | 81%              | (63)             |
| VO <sub>2</sub> /Quartz                            | 190                                     | Sol-Gel                 | 84.2%            | (64)             |
| VO <sub>2</sub> /SiO <sub>2</sub> /Si              | 200                                     | Sputtering              | 40%              | (65)             |
| VO <sub>2</sub> /SiO <sub>2</sub> /Si              | 210                                     | Sputtering              | 67%              | (66)             |
| Nb-doping VO <sub>2</sub> /SiO <sub>2</sub> /Si    | 300                                     | Sputtering              | 62.5%            | (67)             |
| Si-doping VO <sub>2</sub> /SiO <sub>2</sub> /Si    | 260                                     | Sputtering              | 82%              | (68)             |
| VO <sub>2</sub> /Diamond                           | 120                                     | Pulsed laser deposition | 70%              | (69)             |
| VO <sub>2</sub> /Sapphire                          | 120                                     | Sputtering              | 83%              | (70)             |
| VO <sub>2</sub> /Sapphire                          | 100                                     | Pulsed laser deposition | 86.7%            | (71)             |
| Van der Waals epitaxial VO <sub>2</sub> /Mica film | 192                                     | Pulsed laser deposition | 81.2%            | (72)             |
| Epitaxial VO <sub>2</sub> on c-plane sapphire      | 150                                     | Sputtering              | 85%              | (73)             |
| <b>f-VO<sub>2</sub>/CNT film</b>                   | <b>190</b>                              | <b>Sputtering</b>       | <b>84%</b>       | <b>This work</b> |

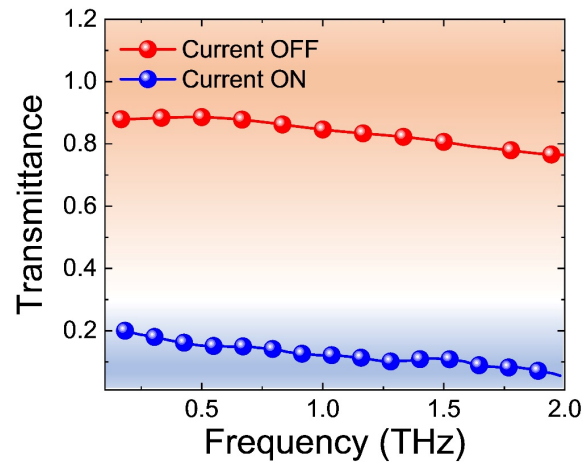

**Fig. S16 Transmittance change of the f-VO<sub>2</sub>/CNT film in the frequency range from 0.2 to 2 THz under electrical stimulation.** The thickness of the f-VO<sub>2</sub> film is ~ 480 nm.

The modulation depth is defined as  $(T_1 - T_2)/T_1$ , where  $T_1$  and  $T_2$  are transmittances without and with modulation. According to Fig. S16, for the 480-nm-thick f-VO<sub>2</sub> film, the maximum modulation depth of the f-VO<sub>2</sub>/CNT film attains 94%.

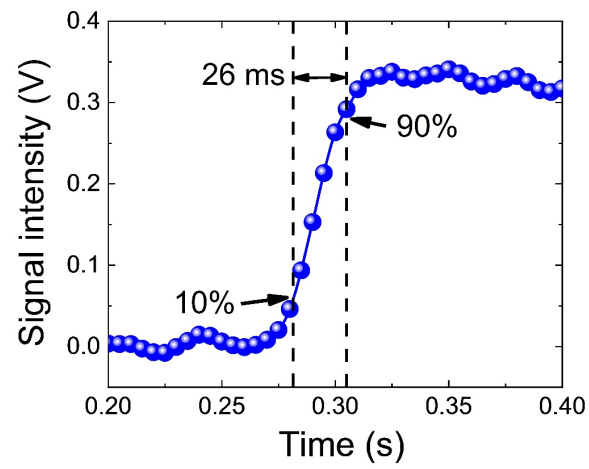

**Fig. S17** Transient response of the THz modulator based on the f-VO<sub>2</sub>/CNT film under electrical stimulation.

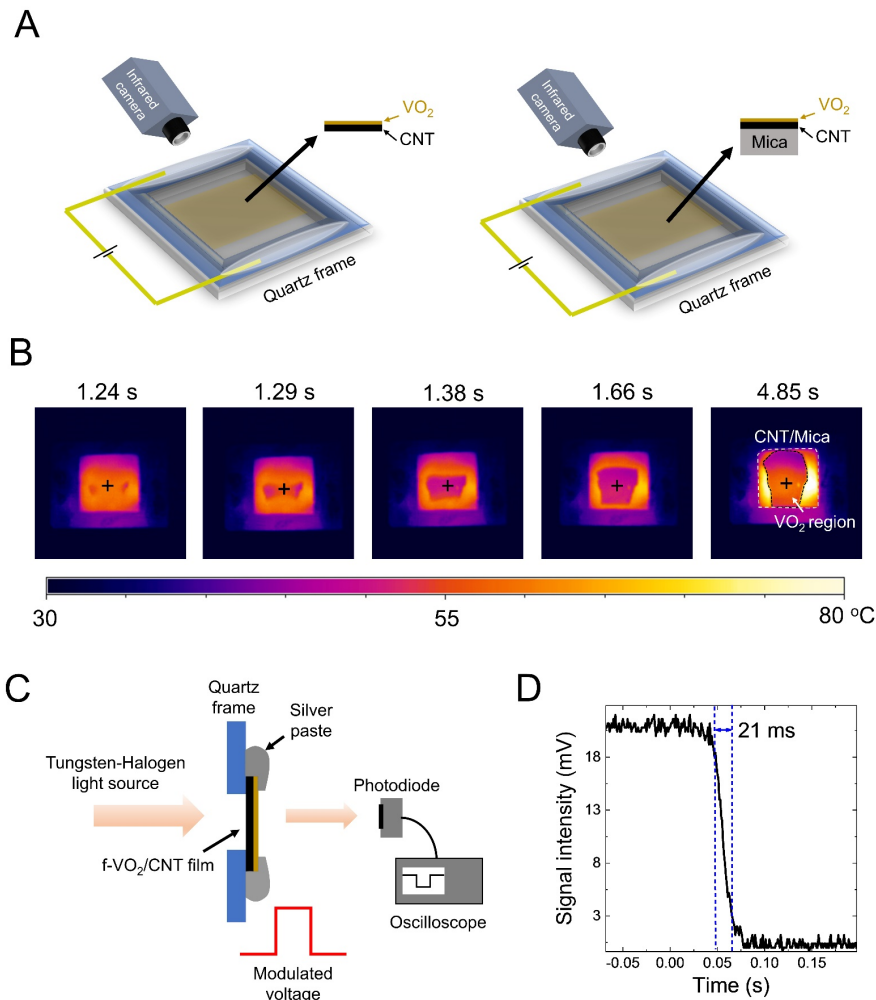

**Fig. S18 Temperature changes of the  $f\text{-VO}_2/\text{CNT}$  film and the  $f\text{-VO}_2/\text{CNT}/\text{mica}$  film under electrical stimulation.** (A) Schematic diagram for measuring nominal temperature changes of an  $f\text{-VO}_2/\text{CNT}$  film (left) and an  $f\text{-VO}_2/\text{CNT}/\text{mica}$  film (right) induced by Joule heating. (B) Thermograms of the  $f\text{-VO}_2/\text{CNT}/\text{mica}$  film from the time of 1.24 to 4.85 s in Fig. 3E. (C) Schematic diagram for measuring the transmittance change of the  $f\text{-VO}_2/\text{CNT}$  film under a square-wave modulated voltage. (D) Response time of the  $f\text{-VO}_2/\text{CNT}$  film under electrical stimulation.

We suspended an  $f\text{-VO}_2/\text{CNT}$  film and an  $f\text{-VO}_2/\text{CNT}/\text{mica}$  film on quartz frames and then made silver paste electrodes on the films (Fig. S18A). The temperature changes of the films due to Joule heating were *in-situ* recorded by the thermographic camera. We note that in the time-response curve of the  $f\text{-VO}_2/\text{CNT}/\text{mica}$  film, a sudden drop of the nominal thermographic temperature ( $T_{\text{IR}}$ ) appears at 1.29 s (Fig. 3E), which is mainly attributed to the decrease of the emissivity induced by the MIT of  $\text{VO}_2$ . After this point,  $T_{\text{IR}}$  decreases (Fig. S18B) but the actual temperature keeps increasing until the maximum temperature is achieved. We also note that this process should also occur in the  $f\text{-VO}_2/\text{CNT}$  film, which, however, cannot be recorded by the thermographic camera because the fast heating process goes beyond the response time limit of the camera. To measure the actual response time of the  $f\text{-VO}_2/\text{CNT}$  film, we used a photodiode to record the modulation speed of the transmittance signal of the  $f\text{-VO}_2/\text{CNT}$  film under electrical stimulation (Fig. S18C). As shown in Fig. S18D, the response time of the  $f\text{-VO}_2/\text{CNT}$  film is only

21 ms for the transmittance change due to the thermally induced MIT, indeed shorter than the response time limit of the thermographic camera.

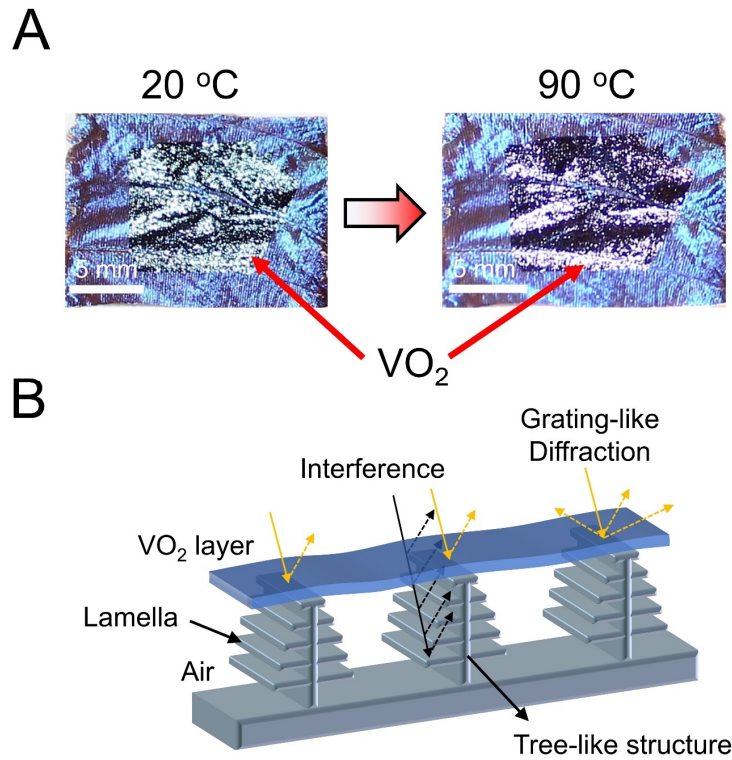

**Fig. S19 Thermochromism of the VO<sub>2</sub>-covered blue-morpho butterfly wing.** (A) Photographs of a 120-nm-thick VO<sub>2</sub> film transferred to the surface of a butterfly wing, before (left, 20 °C) and after (right, 90 °C) heating. Photo credit: He Ma, Beijing University of Technology. (B) Schematic diagram for the structure color on the wing of the blue-morpho butterfly and the color tuning effects by covering a VO<sub>2</sub> film.

As shown in Fig. S19A, we observed dark green in the VO<sub>2</sub>-covered region at 20 °C. The structure color changed to bright purple due to the MIT of VO<sub>2</sub> when the sample is heated to 90 °C. However, there is very little color change in the region of the pristine butterfly wing before and after heating.



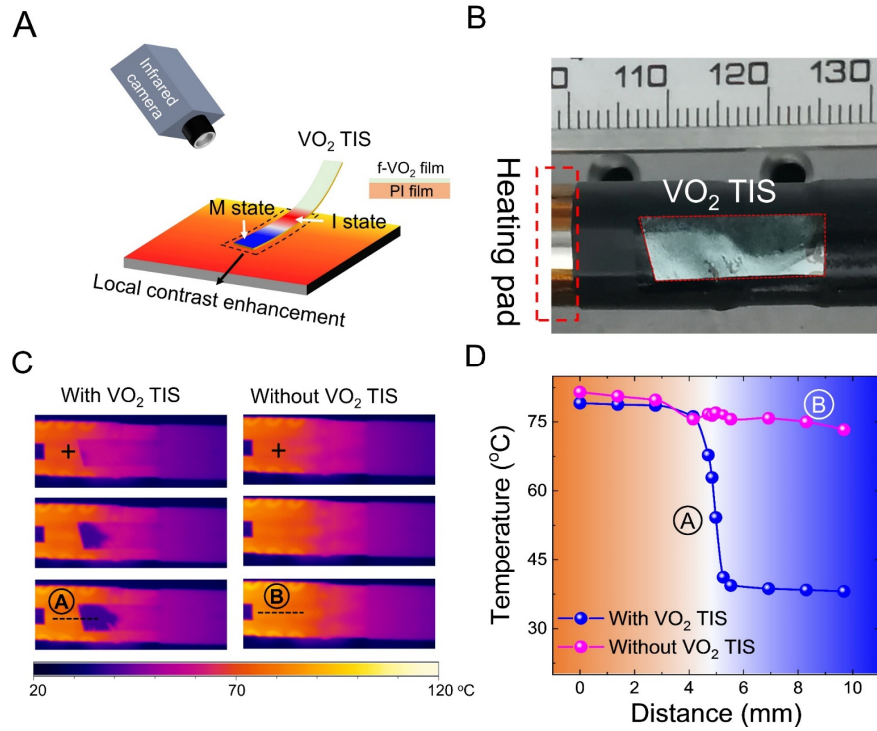

**Fig. S20 Flexible temperature-indicating strip based on the f-VO<sub>2</sub>/PI film.** (A) Working principle of the VO<sub>2</sub> temperature-indicating strip (TIS). (B) Optical image of the VO<sub>2</sub> TIS attached to a metal pillar with a heating pad at one end. The bare surface of the metal pillar was covered with a high emissivity coating. Photo credit: He Ma, Beijing University of Technology. (C) Thermograms for the pillar with the VO<sub>2</sub> TIS and without the VO<sub>2</sub> TIS under heating. The temperature-monitor point was marked by the cross in the upper panel. The temperature of the monitor point in the upper, middle, and lower panels are 70, 75, and 80 °C, respectively. (D) Temperature profiles along the dashed lines in Fig. S20C.

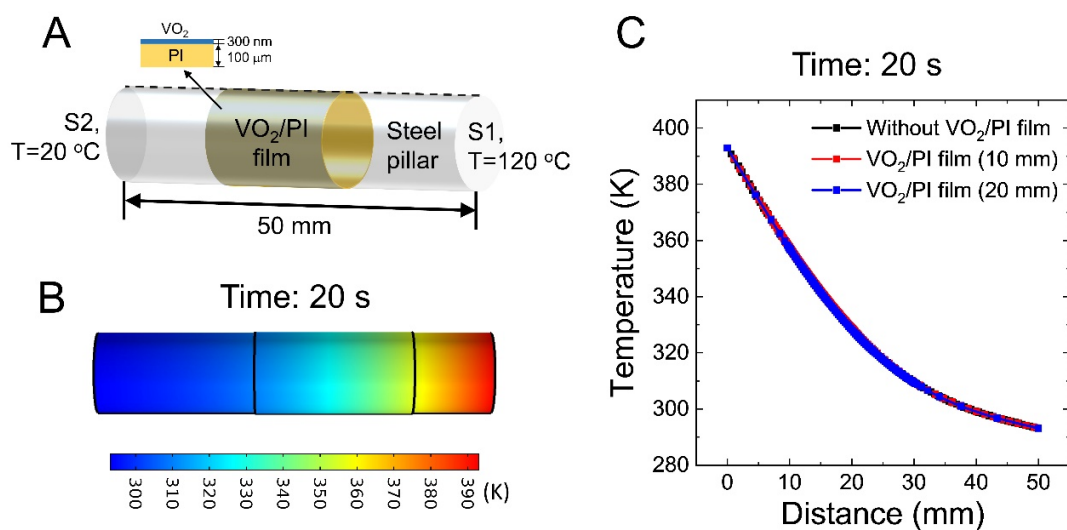

**Fig. S21 Transient thermal-transfer simulation to the pillar covered with flexible VO<sub>2</sub> temperature-indicating strips.** (A) Geometrical model of the pillar covered with a VO<sub>2</sub>/PI film. (B) Temperature distribution on the surface of the pillar covered with the VO<sub>2</sub>/PI film. (C) Temperature distribution along the dashed line in Fig. S21A.

To study the influence of the strip length of the VO<sub>2</sub> TIS on the measured temperature profiles, we performed a transient thermal transfer simulation by the finite element method using COMSOL software. As shown in Fig. S21A, the geometrical model includes a cylinder-like metal pillar surrounded by a VO<sub>2</sub>/PI film. The length and diameter of the pillar are 50 and 13 mm, respectively. The length of the VO<sub>2</sub>/PI surrounding film varies at 0, 10, and 20 mm. The material parameters used in the simulation, including thermal conductivity, thermal capacitance, density, are obtained from the material database of the COMSOL software. The simulation starts when the two ends (S1 and S2) are set at 120 and 20 °C, respectively, at 0 s. The temperature distribution is obtained at the simulation time ranging from 0 to 20 s.

Fig. S21B shows the temperature distribution on the surface of the pillar covered with the 20-mm-long VO<sub>2</sub>/PI film at the simulation time of 20 s. The temperature gradually decreases from the end S1 to S2. We extracted the temperature profile on the surface of the pillar along the dashed line marked in Fig. S21A and compared the temperature profiles of the pristine pillar, the pillar covered with a 10-mm-long VO<sub>2</sub>/PI film, and the pillar covered with a 20-mm-long VO<sub>2</sub>/PI film (Fig. S21C). We can see that the length of the VO<sub>2</sub>/PI film does not influence the temperature distribution on the pillar.

## REFERENCES AND NOTES

1. B. Hu, Y. Ding, W. Chen, D. Kulkarni, Y. Shen, V. V. Tsukruk, Z. L. Wang, External-strain induced insulating phase transition in VO<sub>2</sub> nanobeam and its application as flexible strain sensor. *Adv. Mater.* **22**, 5134–5139 (2010).
2. H. Ma, J. Hou, X. Wang, J. Zhang, Z. Yuan, L. Xiao, Y. Wei, S. Fan, K. Jiang, K. Liu, Flexible, all-inorganic actuators based on vanadium dioxide and carbon nanotube bimorphs. *Nano Lett.* **17**, 421–428 (2017).
3. K. Liu, C. Cheng, J. Suh, R. Tang-Kong, D. Fu, S. Lee, J. Zhou, L. O. Chua, J. Wu, Powerful, multifunctional torsional micromuscles activated by phase transition. *Adv. Mater.* **26**, 1746–1750 (2014).
4. K. Liu, C. Cheng, Z. Cheng, K. Wang, R. Ramesh, J. Wu, Giant-amplitude, high-work density microactuators with phase transition activated nanolayer bimorphs. *Nano Lett.* **12**, 6302–6308 (2012).
5. L. Xiao, H. Ma, J. Liu, W. Zhao, Y. Jia, Q. Zhao, K. Liu, Y. Wu, Y. Wei, S. Fan, K. Jiang, Fast adaptive thermal camouflage based on flexible VO<sub>2</sub>/Graphene/CNT thin films. *Nano Lett.* **15**, 8365–8370 (2015).
6. K. Liu, S. Lee, S. Yang, O. Delaire, J. Wu, Recent progresses on physics and applications of vanadium dioxide. *Mater. Today* **21**, 875–896 (2018).
7. S. Lee, K. Hippalgaonkar, F. Yang, J. Hong, C. Ko, J. Suh, K. Liu, K. Wang, J. J. Urban, X. Zhang, C. Dames, S. A. Hartnoll, O. Delaire, J. Wu, Anomalously low electronic thermal conductivity in metallic vanadium dioxide. *Science* **355**, 371–374 (2017).
8. Y. Ke, S. Wang, G. Liu, M. Li, T. J. White, Y. Long, Vanadium dioxide: The multistimuli responsive material and its applications. *Small* **14**, 1802025 (2018).
9. H. Ma, X. Xiao, X. Zhang, K. Liu, Recent advances for phase-transition materials for actuators. *J. Appl. Phys.* **128**, 101101 (2020).

10. Y. Guo, X. Sun, J. Jiang, B. Wang, X. Chen, X. Yin, W. Qi, L. Gao, L. Zhang, Z. Lu, R. Jia, S. Pendse, Y. Hu, Z. Chen, E. Wertz, D. Gall, J. Feng, T. M. Lu, J. Shi, A reconfigurable remotely epitaxial VO<sub>2</sub> electrical heterostructure. *Nano Lett.* **20**, 33–42 (2020).
11. W. Jiang, T. Zheng, B. Wu, H. Jiao, X. Wang, Y. Chen, X. Zhang, M. Peng, H. Wang, T. Lin, H. Shen, J. Ge, W. Hu, X. Xu, X. Meng, J. Chu, J. Wang, A versatile photodetector assisted by photovoltaic and bolometric effects. *Light Sci. Appl.* **9**, 160 (2020).
12. H. Luo, B. Wang, E. Wang, X. Wang, Y. Sun, Q. Li, S. Fan, C. Cheng, K. Liu, Phase-transition modulated, high-performance dual-mode photodetectors based on WSe<sub>2</sub>/VO<sub>2</sub> heterojunctions. *Appl. Phys. Rev.* **6**, 041407 (2019).
13. B. Wang, R. Peng, X. Wang, Y. Yang, E. Wang, Z. Xin, Y. Sun, C. Li, Y. Wu, J. Wei, J. Sun, K. Liu, Ultrafast, kinetically limited, ambient synthesis of vanadium dioxides through laser direct writing on ultrathin chalcogenide matrix. *ACS Nano* **15**, 10502–10513 (2021).
14. J. Jiang, Z. Chen, Y. Hu, Y. Xiang, L. Zhang, Y. Wang, G. C. Wang, J. Shi, Flexo-photovoltaic effect in MoS<sub>2</sub>. *Nat. Nanotechnol.* **16**, 894–901 (2021).
15. H. S. Kum, H. Lee, S. Kim, S. Lindemann, W. Kong, K. Qiao, P. Chen, J. Irwin, J. H. Lee, S. Xie, S. Subramanian, J. Shim, S. H. Bae, C. Choi, L. Ranno, S. Seo, S. Lee, J. Bauer, H. Li, K. Lee, J. A. Robinson, C. A. Ross, D. G. Schlom, M. S. Rzechowski, C. B. Eom, J. Kim, Heterogeneous integration of single-crystalline complex-oxide membranes. *Nature* **578**, 75–81 (2020).
16. L. Shen, L. Wu, Q. Sheng, C. Ma, Y. Zhang, L. Lu, J. Ma, J. Ma, J. Bian, Y. Yang, A. Chen, X. Lu, M. Liu, H. Wang, C. L. Jia, Epitaxial lift-off of centimeter-scaled spinel ferrite oxide thin films for flexible electronics. *Adv. Mater.* **29**, 1702411 (2017).
17. X. Li, Z. Yin, X. Zhang, Y. Wang, D. Wang, M. Gao, J. Meng, J. Wu, J. You, Epitaxial liftoff of wafer-scale VO<sub>2</sub> nanomembranes for flexible, ultrasensitive tactile sensors. *Adv. Mater. Technol.* **4**, 1800695 (2019).

18. K. Han, L. Wu, Y. Cao, H. Wang, C. Ye, K. Huang, M. Motapothula, H. Xing, X. Li, D. C. Qi, X. Li, X. R. Wang, Enhanced metal-insulator transition in freestanding VO<sub>2</sub> down to 5 nm thickness. *ACS Appl. Mater. Interfaces* **13**, 16688–16693 (2021).
19. Y. Chen, Z. Wang, S. Chen, H. Ren, L. Wang, G. Zhang, Y. Lu, J. Jiang, C. Zou, Y. Luo, Non-catalytic hydrogenation of VO<sub>2</sub> in acid solution. *Nat. Commun.* **9**, 818 (2018).
20. W. D. Kaplan, D. Chatain, P. Wynblatt, W. C. Carter, A review of wetting versus adsorption, complexions, and related phenomena: The rosetta stone of wetting. *J. Mater. Sci.* **48**, 5681–5717 (2013).
21. J. Y. Suh, R. Lopez, L. C. Feldman, R. F. Haglund Jr., Semiconductor to metal phase transition in the nucleation and growth of VO<sub>2</sub> nanoparticles and thin films. *J. Appl. Phys.* **96**, 1209–1213 (2004).
22. K. R. Williams, R. S. Muller, Etch rates for micromachining processing. *J. Microelectromech. Syst.* **5**, 256–269 (1996).
23. H. W. Chen, C. I. Li, C. H. Ma, Y. H. Chu, H. L. Liu, Strain engineering of optical properties in transparent VO<sub>2</sub>/muscovite heterostructures. *Phys. Chem. Chem. Phys.* **23**, 8908–8915 (2021).
24. C. Cheng, K. Liu, B. Xiang, J. Suh, J. Wu, Ultra-long, free-standing, single-crystalline vanadium dioxide micro/nanowires grown by simple thermal evaporation. *Appl. Phys. Lett.* **100**, 103111 (2012).
25. J. Cao, E. Ertekin, V. Srinivasan, W. Fan, S. Huang, H. Zheng, J. W. Yim, D. R. Khanal, D. F. Ogletree, J. C. Grossman, J. Wu, Strain engineering and one-dimensional organization of metal-insulator domains in single-crystal vanadium dioxide beams. *Nat. Nanotechnol.* **4**, 732–737 (2009).
26. G. Zhou, P. Dai, J. Wu, B. Jin, Q. Wen, G. Zhu, Z. Shen, C. Zhang, L. Kang, W. Xu, J. Chen, P. Wu, Broadband and high modulation-depth THz modulator using low bias controlled VO<sub>2</sub>-integrated metasurface. *Opt. Express* **25**, 17322–17328 (2017).

27. M. Seo, J. Kyoung, H. Park, S. Koo, H. S. Kim, H. Bernien, B. J. Kim, J. H. Choe, Y. H. Ahn, H. T. Kim, N. Park, Q. H. Park, K. Ahn, D. S. Kim, Active terahertz nanoantennas based on VO<sub>2</sub> phase transition. *Nano Lett.* **10**, 2064–2068 (2010).
28. H. Cai, S. Chen, C. Zou, Q. Huang, Y. Liu, X. Hu, Z. Fu, Y. Zhao, H. He, Y. Lu, Multifunctional hybrid metasurfaces for dynamic tuning of terahertz waves. *Adv. Opt. Mater.* **6**, 1800257 (2018).
29. F. Hu, Y. Li, X. Xu, Y. Zhou, Y. Chen, P. Zhu, S. Zhao, W. Jiang, W. Zhang, J. Han, Y. Chen, Broadband large-modulation-depth low-current-triggered terahertz intensity modulator based on VO<sub>2</sub> embedded hybrid metamaterials. *Appl. Phys. Express* **11**, 092004 (2018).
30. Y. G. Jeong, H. Bernien, J. S. Kyoung, H. R. Park, H. S. Kim, J. W. Choi, B. J. Kim, H. Kim, K. J. Ahn, D. S. Kim, Electrical control of terahertz nano antennas on VO<sub>2</sub> thin film. *Opt. Express* **19**, 21211–21215 (2011).
31. Z. Sun, A. Martinez, F. Wang, Optical modulators with 2D layered materials. *Nat. Photonics* **10**, 227–238 (2016).
32. C. Han, E. P. J. Parrott, G. Humbert, A. Crunteanu, E. Pickwell-MacPherson, Broadband modulation of terahertz waves through electrically driven hybrid bowtie antenna-VO<sub>2</sub> devices. *Sci. Rep.* **7**, 12725 (2017).
33. F. Fu, L. Shang, Z. Chen, Y. Yu, Y. Zhao, Bioinspired living structural color hydrogels. *Sci. Robot.* **3**, eaar8580 (2018).
34. X. Du, H. Cui, T. Xu, C. Huang, Y. Wang, Q. Zhao, Y. Xu, X. Wu, Reconfiguration, camouflage, and color-shifting for bioinspired adaptive hydrogel-based millirobots. *Adv. Funct. Mater.* **30**, 1909202 (2020).
35. H. Kim, H. Lee, I. Ha, J. Jung, P. Won, H. Cho, J. Yeo, S. Hong, S. Han, J. Kwon, K.-J. Cho, S. H. Ko, Biomimetic color changing anisotropic soft actuators with integrated metal nanowire percolation network transparent heaters for soft robotics. *Adv. Funct. Mater.* **28**, 1801847 (2018).

36. K. Tang, X. Wang, K. Dong, Y. Li, J. Li, B. Sun, X. Zhang, C. Dames, C. Qiu, J. Yao, J. Wu, A thermal radiation modulation platform by emissivity engineering with graded metal-insulator transition. *Adv. Mater.* **32**, 1907071 (2020).
37. K. Tang, K. Dong, C. J. Nicolai, Y. Li, J. Li, S. Lou, C.-W. Qiu, D. H. Raulet, J. Yao, J. Wu, Millikelvin-resolved ambient thermography. *Sci. Adv.* **6**, eabd8688 (2020).
38. M. Marezio, D. B. McWhan, J. P. Remeika, P. D. Dernier, Structural aspects of the metal-insulator transitions in Cr-doped VO<sub>2</sub>. *Phys. Rev. B* **5**, 2541–2551 (1972).
39. X. Jin, H. Tan, Z. Wu, J. Liang, W. Miao, C. S. Lian, J. Wang, K. Liu, H. Wei, C. Feng, P. Liu, Y. Wei, Q. Li, J. Wang, L. Liu, X. Li, S. Fan, W. Duan, K. Jiang, Continuous, ultra-lightweight, and multipurpose super-aligned carbon nanotube tapes viable over a wide range of temperatures. *Nano Lett.* **19**, 6756–6764 (2019).
40. D. Lu, D. J. Baek, S. S. Hong, L. F. Kourkoutis, Y. Hikita, H. Y. Hwang, Synthesis of freestanding single-crystal perovskite films and heterostructures by etching of sacrificial water-soluble layers. *Nat. Mater.* **15**, 1255–1260 (2016).
41. Y. Zhang, L. Shen, M. Liu, X. Li, X. Lu, L. Lu, C. Ma, C. You, A. Chen, C. Huang, L. Chen, M. Alexe, C. L. Jia, Flexible quasi-two-dimensional CoFe<sub>2</sub>O<sub>4</sub> epitaxial thin films for continuous strain tuning of magnetic properties. *ACS Nano* **11**, 8002–8009 (2017).
42. J. Qiao, S. Wang, Z. Wang, C. He, S. Zhao, X. Xiong, S. Wang, X. Zhang, X. Tao, Ultrasensitive and broadband all-optically controlled THz modulator based on MoTe<sub>2</sub>/Si van der Waals heterostructure. *Adv. Opt. Mater.* **8**, 2000160 (2020).
43. Z. W. Shi, X. X. Cao, Q. Y. Wen, T. L. Wen, Q. H. Yang, Z. Chen, W. S. Shi, H. W. Zhang, Terahertz modulators based on silicon nanotip array. *Adv. Opt. Mater.* **6**, 1700620 (2018).
44. W. L. Chan, H. T. Chen, A. J. Taylor, I. Brener, M. J. Cich, D. M. Mittleman, A spatial light modulator for terahertz beams. *Appl. Phys. Lett.* **94**, 213511 (2009).

45. H. Ma, Y. Wang, R. Lu, F. Tan, Y. Fu, G. Wang, D. Wang, K. Liu, S. Fan, K. Jiang, X. Zhang, A flexible, multifunctional, active terahertz modulator with an ultra-low triggering threshold. *J. Mater. Chem. C* **8**, 10213–10220 (2020).
46. B. Sensale-Rodriguez, R. Yan, S. Rafique, M. Zhu, W. Li, X. Liang, D. Gundlach, V. Protasenko, M. M. Kelly, D. Jena, L. Liu, H. G. Xing, Extraordinary control of terahertz beam reflectance in graphene electro-absorption modulators. *Nano Lett.* **12**, 4518–4522 (2012).
47. S. Chen, F. Fan, Y. Miao, X. He, K. Zhang, S. Chang, Ultrasensitive terahertz modulation by silicon-grown MoS<sub>2</sub> nanosheets. *Nanoscale* **8**, 4713–4719 (2016).
48. H. T. Chen, W. J. Padilla, J. M. Zide, A. C. Gossard, A. J. Taylor, R. D. Averitt, Active terahertz metamaterial devices. *Nature* **444**, 597–600 (2006).
49. H.-T. Chen, W. J. Padilla, M. J. Cich, A. K. Azad, R. D. Averitt, A. J. Taylor, A metamaterial solid-state terahertz phase modulator. *Nat. Photonics* **3**, 148–151 (2009).
50. J. Kyoung, M. Seo, H. Park, S. Koo, H. S. Kim, Y. Park, B. J. Kim, K. Ahn, N. Park, H. T. Kim, D. S. Kim, Giant nonlinear response of terahertz nanoresonators on VO<sub>2</sub> thin film. *Opt. Express* **18**, 16452–16459 (2010).
51. Z. Fan, Z. Geng, X. Lv, Y. Su, Y. Yang, J. Liu, H. Chen, Optical controlled terahertz modulator based on tungsten disulfide nanosheet. *Sci. Rep.* **7**, 14828 (2017).
52. H. Kim, Y. Kim, K. S. Kim, H. Y. Jeong, A.-R. Jang, S. H. Han, D. H. Yoon, K. S. Suh, H. S. Shin, T. Y. Kim, W. S. Yang, Flexible thermochromic window based on hybridized VO<sub>2</sub>/graphene. *ACS Nano* **7**, 5769–5776 (2013).
53. S. Bhupathi, S. Wang, M. Abutoama, I. Balin, L. Wang, P. G. Kazansky, Y. Long, I. Abdulhalim, Femtosecond laser-induced vanadium oxide metamaterial nanostructures and the study of optical response by experiments and numerical simulations. *ACS Appl. Mater. Interfaces* **12**, 41905–41918 (2020).



54. C. I. Li, J. C. Lin, H. J. Liu, M. W. Chu, H. W. Chen, C. H. Ma, C. Y. Tsai, H. W. Huang, H. J. Lin, H. L. Liu, P. W. Chiu, Y. H. Chu, Van der Waal epitaxy of flexible and transparent VO<sub>2</sub> film on muscovite. *Chem. Mater.* **28**, 3914–3919 (2016).
55. Y. Chen, L. Fan, Q. Fang, W. Xu, S. Chen, G. Zan, H. Ren, L. Song, C. Zou, Free-standing SWNTs/VO<sub>2</sub>/Mica hierarchical films for high-performance thermochromic devices. *Nano Energy* **31**, 144–151 (2017).
56. T. Chang, Y. Zhu, J. Huang, H. Luo, P. Jin, X. Cao, Flexible VO<sub>2</sub> thermochromic films with narrow hysteresis loops. *Sol. Energ. Mat. Sol. C.* **219**, 110799 (2021).
57. H. Zong, H. Liu, L. Yan, Y. Yin, L. Bian, C. Kang, G. Cao, M. Li, Synchronized improvements of luminous transmittance and solar modulation ability of VO<sub>2</sub> films by employing SnO<sub>2</sub> buffer layers. *Thin Solid Films* **709**, 138174 (2020).
58. P. Zhang, W. Zhang, J. Wang, K. Jiang, J. Zhang, W. Li, J. Wu, Z. Hu, J. Chu, The electro-optic mechanism and infrared switching dynamic of the hybrid multilayer VO<sub>2</sub>/Al:ZnO heterojunctions. *Sci. Rep.* **7**, 4425 (2017).
59. T. Kang, Z. Ma, J. Qin, Z. Peng, W. Yang, T. Huang, S. Xian, S. Xia, W. Yan, Y. Yang, Z. Sheng, J. Shen, C. Li, L. Deng, L. Bi, Large-scale, power-efficient Au/VO<sub>2</sub> active metasurfaces for ultrafast optical modulation. *Nanophotonics* **10**, 909–918 (2021).
60. G. Sun, X. Cao, X. Gao, S. Long, M. Liang, P. Jin, Structure and enhanced thermochromic performance of low-temperature fabricated VO<sub>2</sub>/V<sub>2</sub>O<sub>3</sub> thin film. *Appl. Phys. Lett.* **109**, 143903 (2016).
61. Z. Tian, B. Xu, B. Hsu, L. Stan, Z. Yang, Y. Mei, Reconfigurable vanadium dioxide nanomembranes and microtubes with controllable phase transition temperatures. *Nano Lett.* **18**, 3017–3023 (2018).
62. J. S. Sim, Y. Zhou, S. Ramanathan, Suspended sub-50 nm vanadium dioxide membrane transistors: fabrication and ionic liquid gating studies. *Nanoscale* **4**, 7056–7062 (2012).

63. Q. Shi, W. Huang, Y. Zhang, J. Yan, Y. Zhang, M. Mao, Y. Zhang, M. Tu, Giant phase transition properties at terahertz range in VO<sub>2</sub> films deposited by sol-gel method. *ACS Appl. Mater. Interfaces* **3**, 3523–3527 (2011).
64. H.-F. Zhu, L.-H. Du, J. Li, Q.-W. Shi, B. Peng, Z.-R. Li, W.-X. Huang, L.-G. Zhu, Near-perfect terahertz wave amplitude modulation enabled by impedance matching in VO<sub>2</sub> thin films. *Appl. Phys. Lett.* **112**, 081103 (2018).
65. S. Chen, H. Yuan, Z. Zhai, L. Du, S. Zhong, H. Zhu, Q. Shi, W. Huang, Z. Li, L. Zhu, All optically driven memory device for terahertz waves. *Opt. Lett.* **45**, 236–239 (2020).
66. X. Wu, Z. Wu, C. Ji, H. Zhang, Y. Su, Z. Huang, J. Gou, X. Wei, J. Wang, Y. Jiang, THz transmittance and electrical properties tuning across IMT in vanadium dioxide films by Al doping. *ACS Appl. Mater. Interfaces* **8**, 11842–11850 (2016).
67. C. Ji, Z. Wu, X. Wu, H. Feng, J. Wang, Z. Huang, H. Zhou, W. Yao, J. Gou, Y. Jiang, Optimization of metal-to-insulator phase transition properties in polycrystalline VO<sub>2</sub> films for terahertz modulation applications by doping. *J. Mater. Chem. C* **6**, 1722–1730 (2018).
68. H. Zhang, Z. Wu, R. Niu, X. Wu, Q. He, Y. Jiang, Metal–insulator transition properties of sputtered silicon-doped and un-doped vanadium dioxide films at terahertz range. *Appl. Surf. Sci.* **331**, 92–97 (2015).
69. A. Pashkin, C. Kübler, H. Ehrke, R. Lopez, A. Halabica, R. F. Haglund, R. Huber, A. Leitenstorfer, Ultrafast insulator-metal phase transition in VO<sub>2</sub> studied by multiterahertz spectroscopy. *Phys. Rev. B* **83**, 195120 (2011).
70. D. Fu, K. Liu, T. Tao, K. Lo, C. Cheng, B. Liu, R. Zhang, H. A. Bechtel, J. Wu, Comprehensive study of the metal-insulator transition in pulsed laser deposited epitaxial VO<sub>2</sub> thin films. *J. Appl. Phys.* **113**, 043707 (2013).
71. Z. Ren, L. Cheng, L. Hu, C. Liu, C. Jiang, S. Yang, Z. Ma, C. Zhou, H. Wang, X. Zhu, Y. Sun, Z. Sheng, Photoinduced broad-band tunable terahertz absorber based on a VO<sub>2</sub> thin film. *ACS Appl. Mater. Interfaces* **12**, 48811–48819 (2020).

72. W. Liang, Y. Jiang, J. Guo, N. Li, W. Qiu, H. Yang, Y. Ji, S. N. Luo, Van der Waals heteroepitaxial VO<sub>2</sub>/Mica films with extremely low optical trigger threshold and large THz field modulation depth. *Adv. Opt. Mater.* **7**, 1900647 (2019).

73. C. Chen, Y. Zhu, Y. Zhao, J. H. Lee, H. Wang, A. Bernussi, M. Holtz, Z. Fan, VO<sub>2</sub> multidomain heteroepitaxial growth and terahertz transmission modulation. *Appl. Phys. Lett.* **97**, 211905 (2010).
